# Supplementary material for: Organic Electrochemical Transistor Immuno-Sensors for Spike Protein Early Detection
Source: MDPI journal article supplement (doi:10.3390/bios13070739), 2023-07-17
Supplement: s1 [file s1]

Supplementary

# Organic Electrochemical Transistor Immuno-Sensors for Spike Protein Early Detection

Mario Barra <sup>1,\*</sup>, Giovanna Tomauiuolo <sup>2,3</sup>, Valeria Rachela Villella <sup>2,3</sup>, Speranza Esposito <sup>2,3</sup>, Aris Liboà <sup>4,5</sup>, Pasquale D'Angelo <sup>4</sup>, Simone Luigi Marasso <sup>4,6</sup>, Matteo Cocuzza <sup>4,6</sup>, Valentina Bertana <sup>6</sup>, Elena Camilli <sup>6</sup> and Valentina Preziosi <sup>2,3,\*</sup>

<sup>1</sup> CNR-SPIN, c/o Department of Physics "Ettore Pancini", P.le Tecchio, 80, 80125 Napoli, Italy

<sup>2</sup> Department of Chemical, Materials and Production Engineering —University Federico II, P.le Tecchio 80, 80125 Napoli, Italy; g.tomaiuolo@unina.it (G.T.); valeria.villella@gmail.com (V.R.V.); speranza.esposito@gmail.com (S.E.)

<sup>3</sup> CEINGE, Advanced Biotechnologies, 80145 Napoli, Italy

<sup>4</sup> IMEM-CNR, Parco Area delle Scienze 37/A, 43124 Parma, Italy; aris.liboà@unipr.it (A.L.); pasquale.dangelo@imem.cnr.it (P.D.)

<sup>5</sup> Graduate School in Science and Technologies of Materials and Department of Physics, University of Parma, Parco Area delle Scienze, 7/A, 43121 Parma, Italy

<sup>6</sup> ChiLab, Department of Applied Science and Technology, Politecnico di Torino, 10129 Torino, Italy; simone.marasso@polito.it (S.L.M.); matteo.cocuzza@polito.it (M.C.); valentina.bertana@polito.it (V.B.); elena.camilli@studenti.polito.it (E.C.)

\* Correspondence: mario.barra@spin.cnr.it (M.B.); valentina.preziosi@unina.it (V.P.); Tel.: +39-0817682428 (M.B.); +39-0817682539 (V.P.)

**Citation:** Barra, M.; Tomauiuolo, G.; Villella, V.R.; Esposito, S.; Liboà, A.; D'Angelo, P.; Marasso, S.L.; Cocuzza, M.; Bertana, V.; Camilli, E.; et al. Organic Electrochemical Transistor Immuno-Sensors for Spike Protein Early Detection. *Biosensors* **2023**, *12*, x. <https://doi.org/10.3390/xxxxx>

Received: 15 June 2023

Revised: 3 July 2023

Accepted: 5 July 2023

Published: 17 July 2023

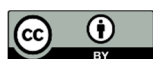

**Copyright:** © 2023 by the authors. Submitted for possible open access publication under the terms and conditions of the Creative Commons Attribution (CC BY) license (<https://creativecommons.org/licenses/by/4.0/>).

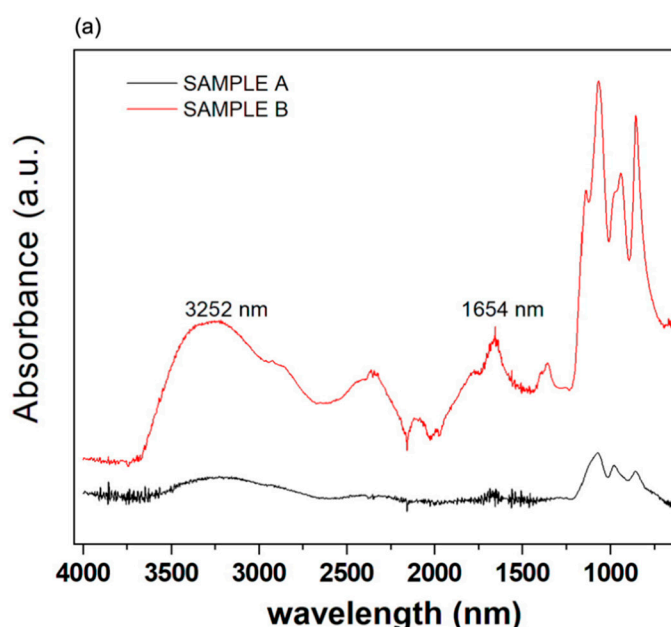

**Figure S1.** FTIR spectra recorded for a gold surface before (SAMPLE A) and after (SAMPLE B) the complete functionalization process with anti-spike antibody.

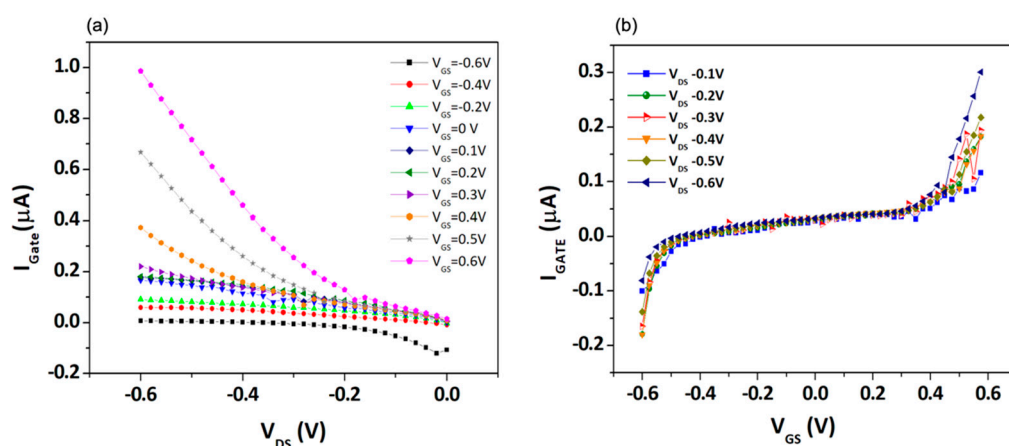

**Figure S2.**  $I_{GATE}$  curves corresponding to the output (a) and transfer curves (b) reported, respectively, in Fig.2a and 2b of the main text.

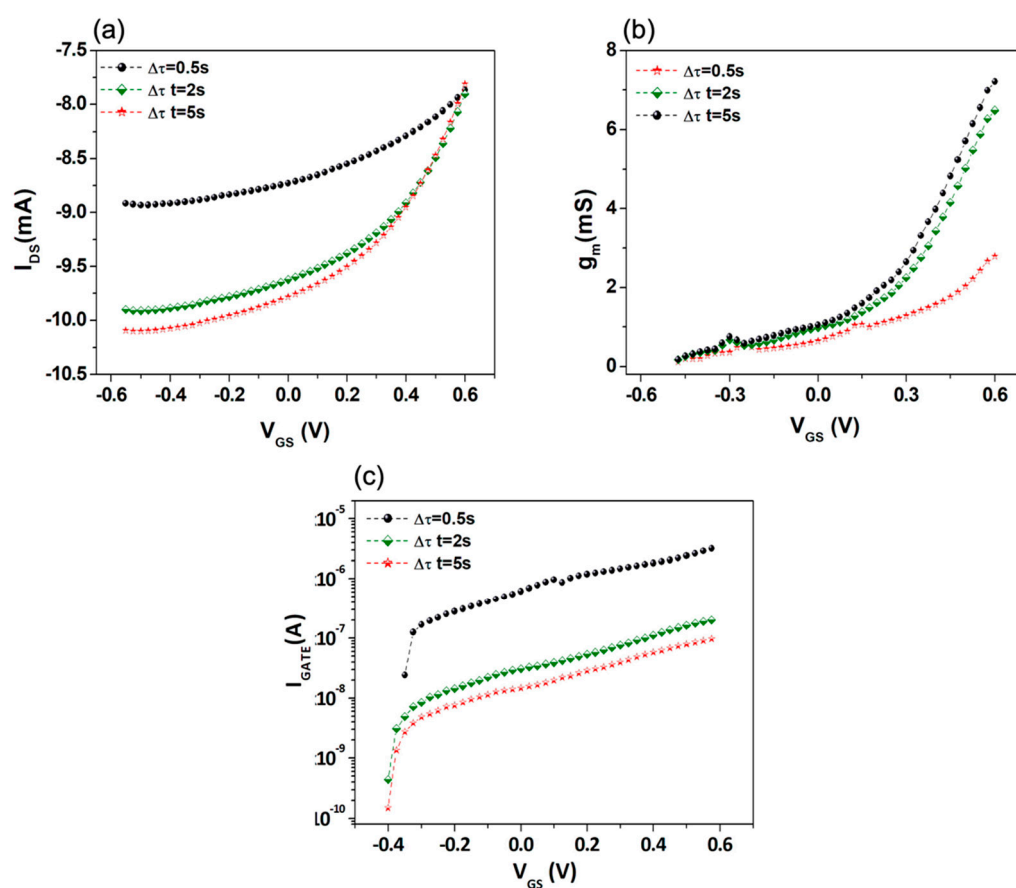

**Figure S3.** (a) Transfer curves achieved ( $V_{DS} = -0.3$  V) using different values of the time delay between the  $V_{GS}$  application and the  $I_{DS}$  recording. The corresponding transconductance ( $g_m$ ) and  $I_{GATE}$  values are reported in (b,c), respectively.

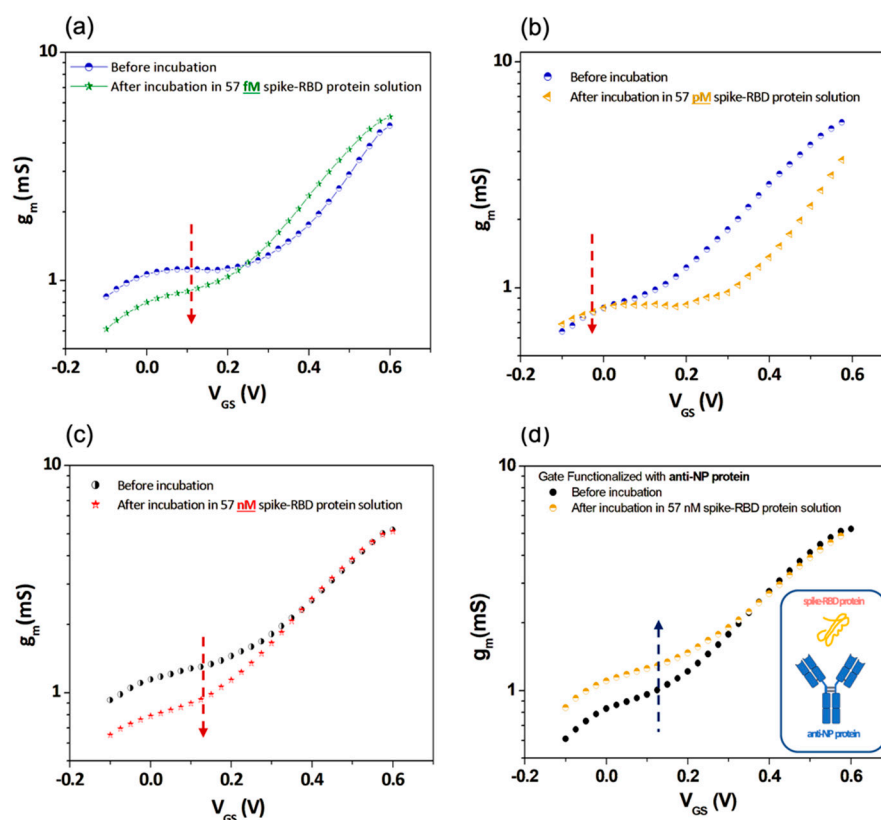

**Figure S4.** (a–c) Transconductance ( $g_m$ ) curves as a function of  $V_{GS}$  extracted from the transfer-curves shown, respectively, in (a–c) of the main text; (d)  $g_m$  curves evaluated from the transfer curves shown in (a).

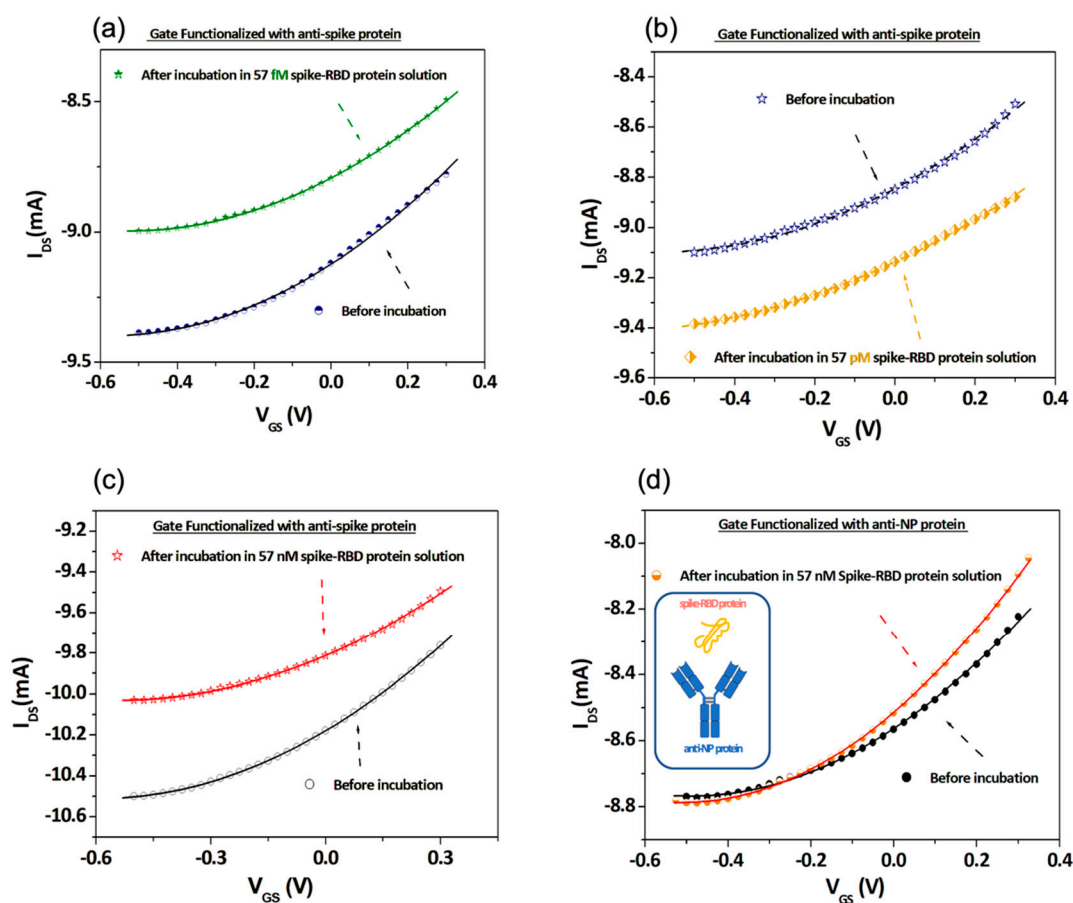

**Figure S5.** OECT transfer-curves (scatter symbols) with  $V_{DS} = -0.3$  V and related fitting curves with the equation  $I_{DS} = (\alpha + \beta \cdot V + \gamma \cdot V^2)$  (solid lines) achieved by using a functionalized gate with anti-spike protein before incubation and after incubation in solutions with (a) 57 femtomolar (fM); (b) 57 picomolar (pM) and (c) 57 nanomolar (nM) spike-RBD protein; (d) Corresponding transfer-curves and fitting lines obtained for a functionalized gate with nucleocapside (NP) antibody before incubation and after incubation with 57 nanomolar spike-RBD protein solution.
